# Supplementary material
Source: PubMed Central journal article supplement (PMC7089668)
Supplement: awaa021_supplementary_data.pdf [file awaa021_supplementary_data.pdf]

## **Supplementary Materials**

### **Soluble TREM2 is elevated in Parkinson's disease subgroups with elevated CSF tau**

Edward N. Wilson *et al*

Neurology and Neurological Sciences, Stanford University School of Medicine, Stanford University, Stanford, CA, USA

\*Corresponding author: [kandreas@stanford.edu](mailto:kandreas@stanford.edu)

## Supplementary Tables

**Supplementary Table S1. CSF Amyloid and Tau Biomarkers**

|                                      | Healthy Controls<br>(n = 17) | Pure LB PD<br>(n =86) | Amyloid+ PD<br>(n=16) | Amyloid+ Tau+ PD<br>(n=23) | Tau+ PD<br>(n=23)  | P-value* |
|--------------------------------------|------------------------------|-----------------------|-----------------------|----------------------------|--------------------|----------|
| CSF A $\beta$ 1-42 (pg/ml; Mean, SD) | 1002.77 (390.94)             | 1000.14 (334.19)      | 596.75 (201.42)       | 756.13 (322.66)            | 1748.83 (455.96)   | <0.0001  |
| CSF A $\beta$ 1-40 (pg/ml; Mean, SD) | 7987.59 (2853.18)            | 7568.00 (2218.13)     | 6981.81 (1974.63)     | 10146.17 (3107.54)         | 12902.22 (2522.55) | <0.0001  |
| CSF t-tau (pg/ml; Mean, SD)          | 225.94 (90.70)               | 217.12 (91.54)        | 161.44 (67.37)        | 559.48 (303.61)            | 382.13 (112.74)    | <0.0001  |
| CSF p-tau 181 (pg/ml; Mean, SD)      | 33.37 (11.11)                | 27.38 (6.52)          | 38.01 (7.92)          | 67.81 (32.44)              | 48.58 (8.53)       | <0.0001  |

\*Kruskal-Wallis test

**Supplementary Table S2. Figure 1 Outlier Removal: CSF sTREM2 as a function of Clinical Diagnosis, age, and gender.**

| Group           | No. of Outliers |
|-----------------|-----------------|
| Healthy Control | 0               |
| PDN             | 2               |
| PDMCI           | 4               |
| PDD             | 0               |

|                                                     | Outliers Included           | Outliers removed             |
|-----------------------------------------------------|-----------------------------|------------------------------|
| <b>One-way ANCOVA</b>                               | F(3,159) = 4.588, P = 0.004 | F(3,153) = 4.0781, P = 0.008 |
| <b>Post Hoc Tukey Contrasts - Adjusted P values</b> |                             |                              |
| HC VS PDN                                           | P = 0.046                   | P = 0.071                    |
| HC VS PDMCI                                         | ns                          | ns                           |
| HC VS PDD                                           | ns                          | ns                           |
| PDN VS PDMCI                                        | ns                          | ns                           |
| PDN VS PDD                                          | ns                          | ns                           |
| PDMCI VS PDD                                        | ns                          | ns                           |

**Supplementary Table S3. Figure 1 Outlier Removal: Plasma sTREM2 as a function of Clinical Diagnosis, age, and gender.**

| Group           | No. of Outliers |
|-----------------|-----------------|
| Healthy Control | 0               |
| PDN             | 5               |
| PDMCI           | 18              |
| PDD             | 4               |

|                                                     | <b>Outliers Included</b>    | <b>Outliers removed</b>     |
|-----------------------------------------------------|-----------------------------|-----------------------------|
| <b>One-way ANCOVA</b>                               | F(3,159) = 0.518, P = 0.671 | F(3,132) = 0.575, P = 0.632 |
| <b>Post Hoc Tukey Contrasts - Adjusted P values</b> |                             |                             |
| HC VS PDN                                           | ns                          | ns                          |
| HC VS PDMCI                                         | ns                          | ns                          |
| HC VS PDD                                           | ns                          | ns                          |
| PDN VS PDMCI                                        | ns                          | ns                          |
| PDN VS PDD                                          | ns                          | ns                          |
| PDMCI VS PDD                                        | ns                          | ns                          |

Supplementary Table S4. Figure 3 Outlier Removal: CSF sTREM2 as a function of Biomarker profile, age, and gender.

| <b>Group</b>     | <b>No. of Outliers</b> |
|------------------|------------------------|
| Healthy Control  | 0                      |
| Pure LB PD       | 1                      |
| Amyloid+ PD      | 0                      |
| Amyloid+ Tau+ PD | 0                      |
| Tau+ PD          | 1                      |

|                                                     | <b>Outliers Included</b>     | <b>Outliers removed</b>       |
|-----------------------------------------------------|------------------------------|-------------------------------|
| <b>One-way ANCOVA</b>                               | F(4,158) = 8.926, P < 0.0001 | F(4,156) = 9.1652, P < 0.0001 |
| <b>Post Hoc Tukey Contrasts - Adjusted P values</b> |                              |                               |
| HC vs Pure LB PD                                    | ns                           | ns                            |
| HC vs Amyloid+ PD                                   | ns                           | ns                            |
| HC vs Amyloid+ Tau+ PD                              | P < 0.001                    | P < 0.001                     |
| HC vs Tau+ PD                                       | P < 0.001                    | P = 0.0017                    |
| Pure LB PD vs Amyloid+ PD                           | ns                           | ns                            |
| Pure LB PD vs Amyloid+ Tau+ PD                      | P < 0.001                    | P = 0.0070                    |
| Pure LB PD vs Tau+ PD                               | P = 0.0017                   | ns                            |
| Amyloid+ PD vs Amyloid+ Tau+ PD                     | P = 0.0107                   | P < 0.001                     |
| Amyloid+ PD vs Tau+ PD                              | P = 0.0574                   | P = 0.0036                    |
| Amyloid+ Tau+ PD vs Tau+ PD                         | ns                           | ns                            |

Supplementary Table S5. Figure 4 Outlier Removal: CSF sTREM2 as a function of biomarker profile in each cognitive subgroup, age, and gender.

| <b>Cognitively Normal</b> |                        | <b>MCI</b>       |                        | <b>Dementia</b>  |                        |
|---------------------------|------------------------|------------------|------------------------|------------------|------------------------|
| <b>Group</b>              | <b>No. of Outliers</b> | <b>Group</b>     | <b>No. of Outliers</b> | <b>Group</b>     | <b>No. of Outliers</b> |
| Healthy Control           | 0                      | Healthy Control  | 0                      | Healthy Control  | 0                      |
| Pure LB PD                | 0                      | Pure LB PD       | 2                      | Pure LB PD       | 0                      |
| Amyloid+ PD               | 0                      | Amyloid+ PD      | 0                      | Amyloid+ PD      | 0                      |
| Amyloid+ Tau+ PD          | 0                      | Amyloid+ Tau+ PD | 0                      | Amyloid+ Tau+ PD | 0                      |
| Tau+ PD                   | 1                      | Tau+ PD          | 0                      | Tau+ PD          | 0                      |

|                                              | Cognitively Normal         |                            | MCI                        |                             | Dementia                   |                      |
|----------------------------------------------|----------------------------|----------------------------|----------------------------|-----------------------------|----------------------------|----------------------|
|                                              | Outliers Included          | Outliers removed           | Outliers Included          | Outliers removed            | Outliers Included          | Outliers removed     |
| One-way ANCOVA                               | F(3,39) = 4.415, P = 0.009 | F(3,38) = 3.608, P = 0.022 | F(3,80) = 6.626, P = 0.001 | F(3,28) = 8.707, P < 0.0001 | F(2,12) = 4.498, P = 0.035 | No Outliers Detected |
| Post Hoc Tukey Contrasts - Adjusted P values |                            |                            |                            |                             |                            |                      |
| Pure IB PD vs Amyloids PD                    | ns                         | ns                         | ns                         | ns                          | ns                         | No Outliers Detected |
| Pure IB PD vs Amyloids Tau PD                | P = 0.0476                 | P = 0.0301                 | P = 0.0016                 | P < 0.001                   | P = 0.00282                | No Outliers Detected |
| Pure IB PD vs Tau PD                         | P = 0.0468                 | ns                         | P = 0.0517                 | P = 0.010                   | No Tau+ PD Participants    | No Outliers Detected |
| Amyloids PD vs Amyloids Tau PD               | ns                         | ns                         | P = 0.0090                 | P = 0.0060                  | ns                         | No Outliers Detected |
| Amyloids PD vs Tau PD                        | ns                         | ns                         | ns                         | ns                          | No Tau+ PD Participants    | No Outliers Detected |
| Amyloids Tau PD vs Tau PD                    | ns                         | ns                         | ns                         | ns                          | No Tau+ PD Participants    | No Outliers Detected |

Supplementary Table S6. Figure 5 Outlier Removal: Association between CSF sTREM2 and CSF amyloid and tau biomarkers

| CSF Biomarker | Cognitively Normal | MCI | Dementia |
|---------------|--------------------|-----|----------|
| T-tau         | 2                  | 3   | 1        |
| P-Tau181      | 5                  | 4   | 1        |
| AB1-42        | 3                  | 0   | 0        |
| AB1-40        | 0                  | 0   | 0        |

|                         | Cognitively Normal |       |        |                            |       |        |
|-------------------------|--------------------|-------|--------|----------------------------|-------|--------|
|                         | Outliers Included  |       |        | Biomarker Outliers Removed |       |        |
|                         | $\beta$            | SE    | P      | $\beta$                    | SE    | P      |
| CSF sTREM2 and T-tau    | +0.592             | 0.186 | 0.003  | +0.525                     | 0.269 | 0.059  |
| CSF sTREM2 and P-Tau181 | +1.068             | 0.262 | 0.0002 | +0.810                     | 0.313 | 0.014  |
| CSF sTREM2 and AB1-42   | +0.327             | 0.209 | 0.126  | +0.203                     | 0.245 | 0.414  |
| CSF sTREM2 and AB1-40   | +0.910             | 0.234 | 0.0004 | +0.910                     | 0.234 | <0.001 |

|                         | Mild Cognitive Impairment |       |         |                  |       |       |
|-------------------------|---------------------------|-------|---------|------------------|-------|-------|
|                         | Outliers Included         |       |         | Outliers Removed |       |       |
|                         | $\beta$                   | SE    | P       | $\beta$          | SE    | P     |
| CSF sTREM2 and T-tau    | +0.510                    | 0.118 | < 0.001 | +0.250           | 0.141 | 0.079 |
| CSF sTREM2 and P-Tau181 | +0.349                    | 0.156 | 0.028   | +0.449           | 0.18  | 0.015 |
| CSF sTREM2 and AB1-42   | +0.140                    | 0.14  | 0.32    | +0.095           | 0.14  | 0.319 |
| CSF sTREM2 and AB1-40   | +0.329                    | 0.177 | 0.067   | +0.329           | 0.177 | 0.067 |

|                         | Dementia          |       |       |                  |       |       |
|-------------------------|-------------------|-------|-------|------------------|-------|-------|
|                         | Outliers Included |       |       | Outliers Removed |       |       |
|                         | $\beta$           | SE    | P     | $\beta$          | SE    | P     |
| CSF sTREM2 and T-tau    | +0.511            | 0.267 | 0.078 | +0.677           | 0.371 | 0.093 |
| CSF sTREM2 and P-Tau181 | +0.477            | 0.177 | 0.018 | +0.543           | 0.212 | 0.024 |
| CSF sTREM2 and AB1-42   | +0.214            | 0.318 | 0.512 | +0.214           | 0.318 | 0.512 |
| CSF sTREM2 and AB1-40   | +0.797            | 0.243 | 0.006 | +0.797           | 0.243 | 0.006 |

**Supplementary Table S7. Figure 6 Outlier Removal: Association between CSF sTREM2 and MoCA**

| <b>Diagnostic Group</b> | <b>No. of Outliers</b> |
|-------------------------|------------------------|
| Pure LB PD              | 1                      |
| Amyloid+ PD             | 0                      |
| Amyloid+ Tau+ PD        | 0                      |
| Tau+ PD                 | 0                      |

|                  | <b>Outliers Included</b> |       |          | <b>Outliers Removed</b> |       |          |
|------------------|--------------------------|-------|----------|-------------------------|-------|----------|
|                  | $\beta$                  | SE    | <i>P</i> | $\beta$                 | SE    | <i>P</i> |
| Pure LB PD       | +0.079                   | 0.012 | 0.456    | +0.009                  | 0.021 | 0.675    |
| Amyloid+ PD      | +0.316                   | 0.028 | 0.348    | No Outliers Detected    |       |          |
| Amyloid+ Tau+ PD | +0.545                   | 0.028 | 0.021    | No Outliers Detected    |       |          |
| Tau+ PD          | +0.538                   | 0.059 | 0.036    | No Outliers Detected    |       |          |
